# Supplementary material for: Eurothiocin A and B, Sulfur-Containing Benzofurans from a Soft Coral-Derived Fungus Eurotium rubrum SH-823
Source: PubMed Central journal article supplement (PMC4071596; doi:10.3390/md12063669), 2014-06-20
Supplement: marinedrugs-12-03669-s001.pdf [file marinedrugs-12-03669-s001.pdf]

# Supplementary Information

Figure S1.  $^1\text{H}$  NMR spectrum (400 MHz,  $\text{CDCl}_3$ ) of eurothiocin A (**1**).

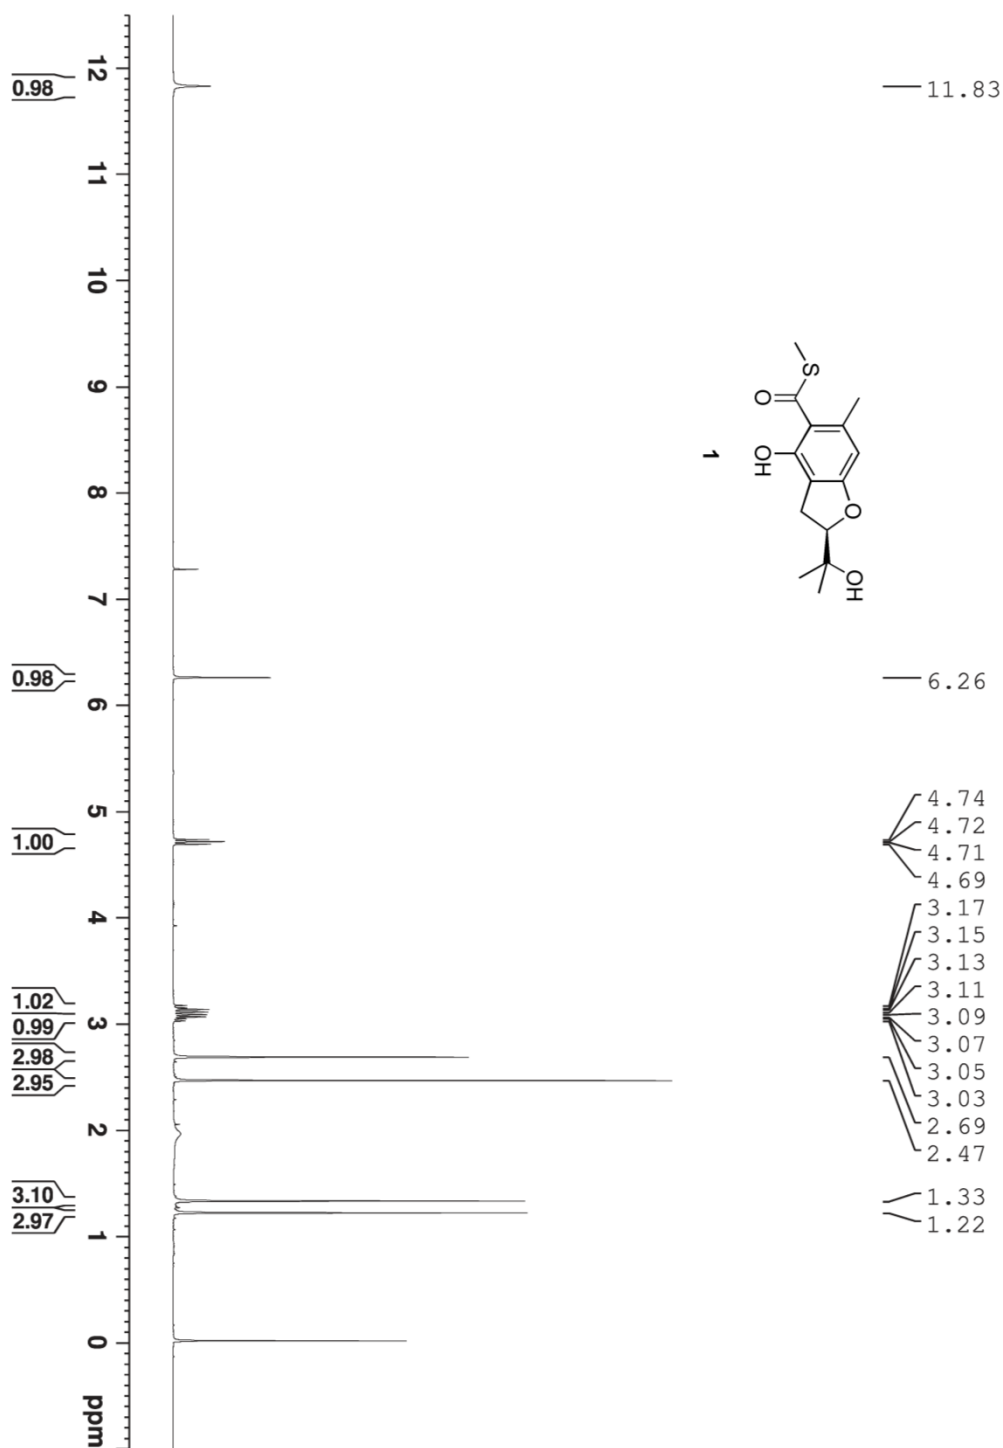

**Figure S2.**  $^{13}\text{C}$  NMR spectrum (100 MHz,  $\text{CDCl}_3$ ) of eurothiocin A (**1**).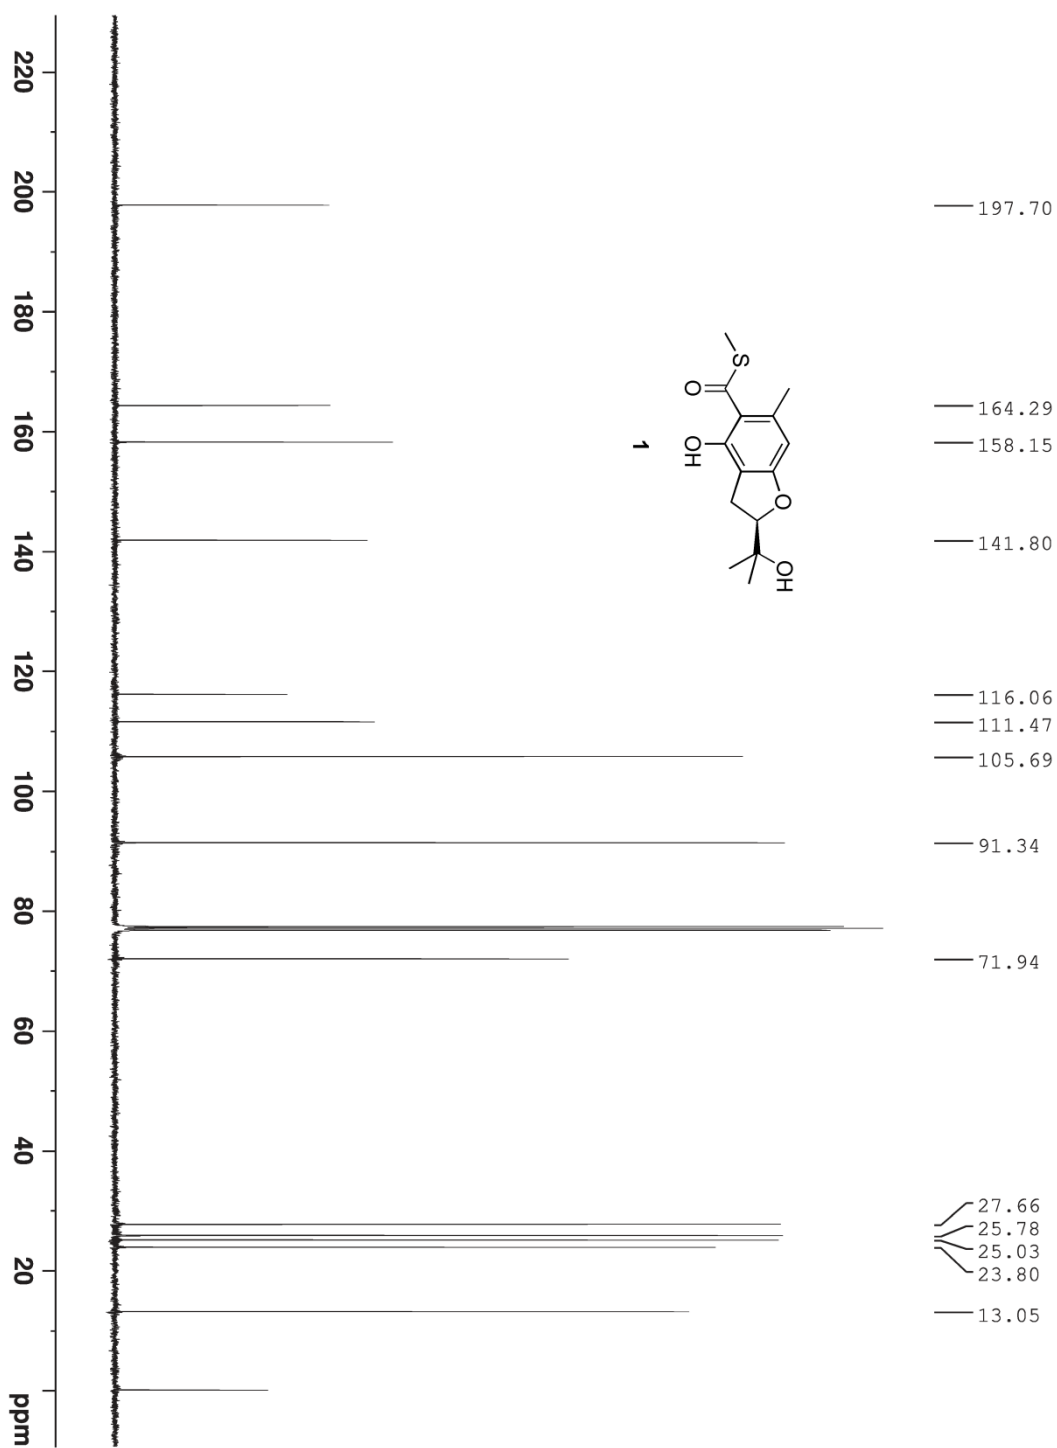

Figure S3. DEPT 90 spectrum of eurothiocin A (1).

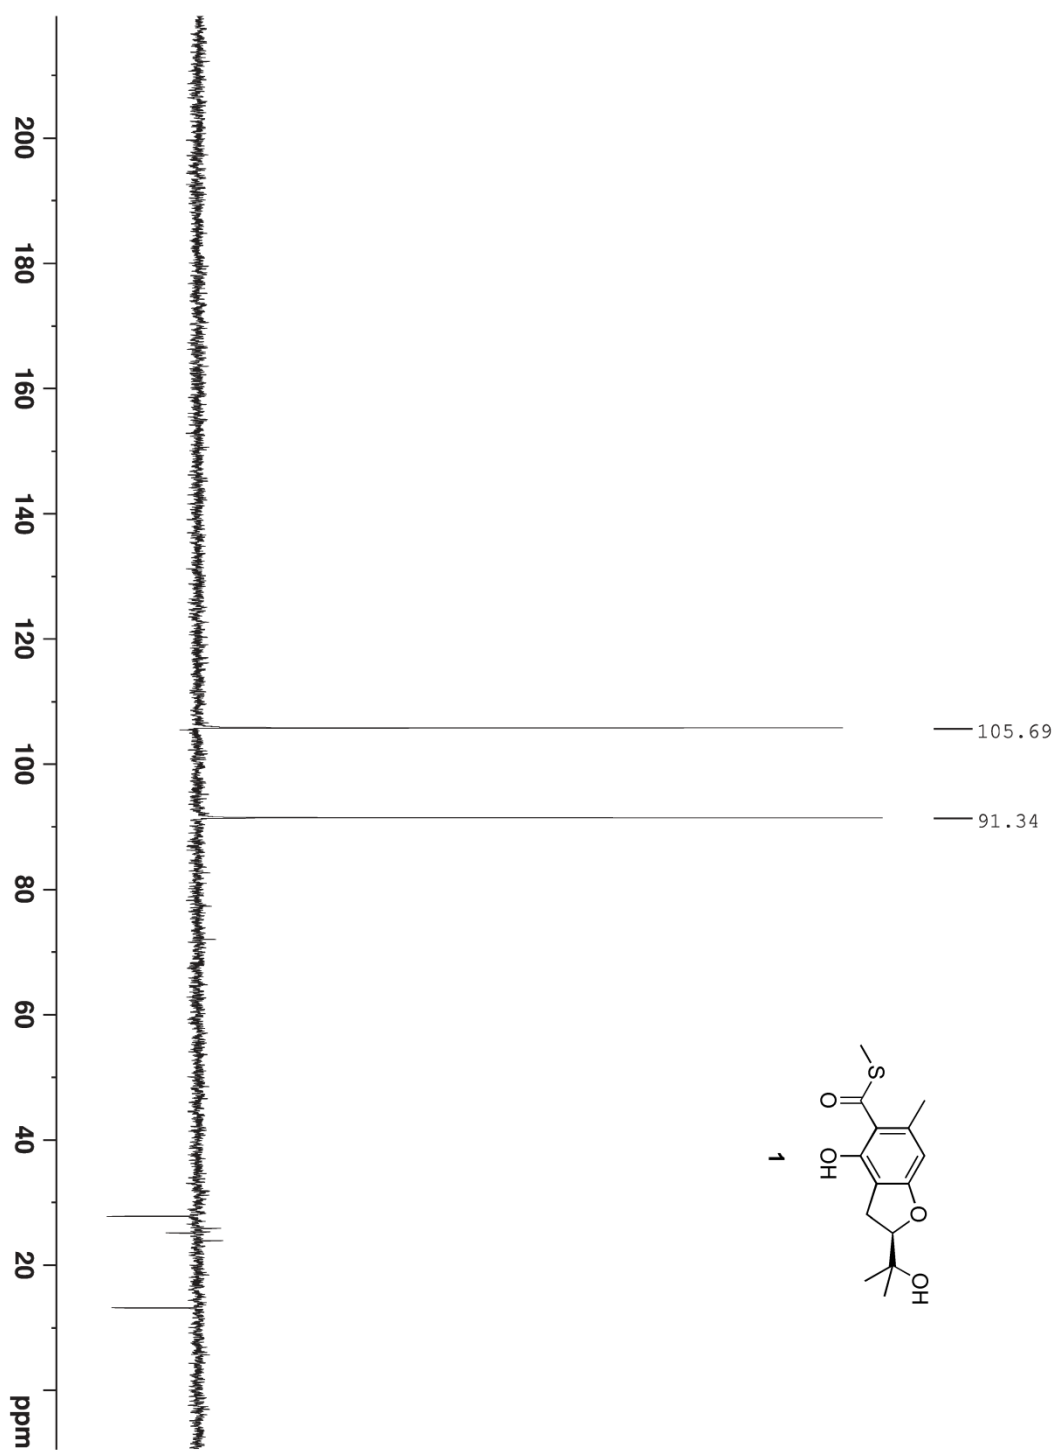

Figure S4. DEPT 135 spectrum of eurothiocin A (1).

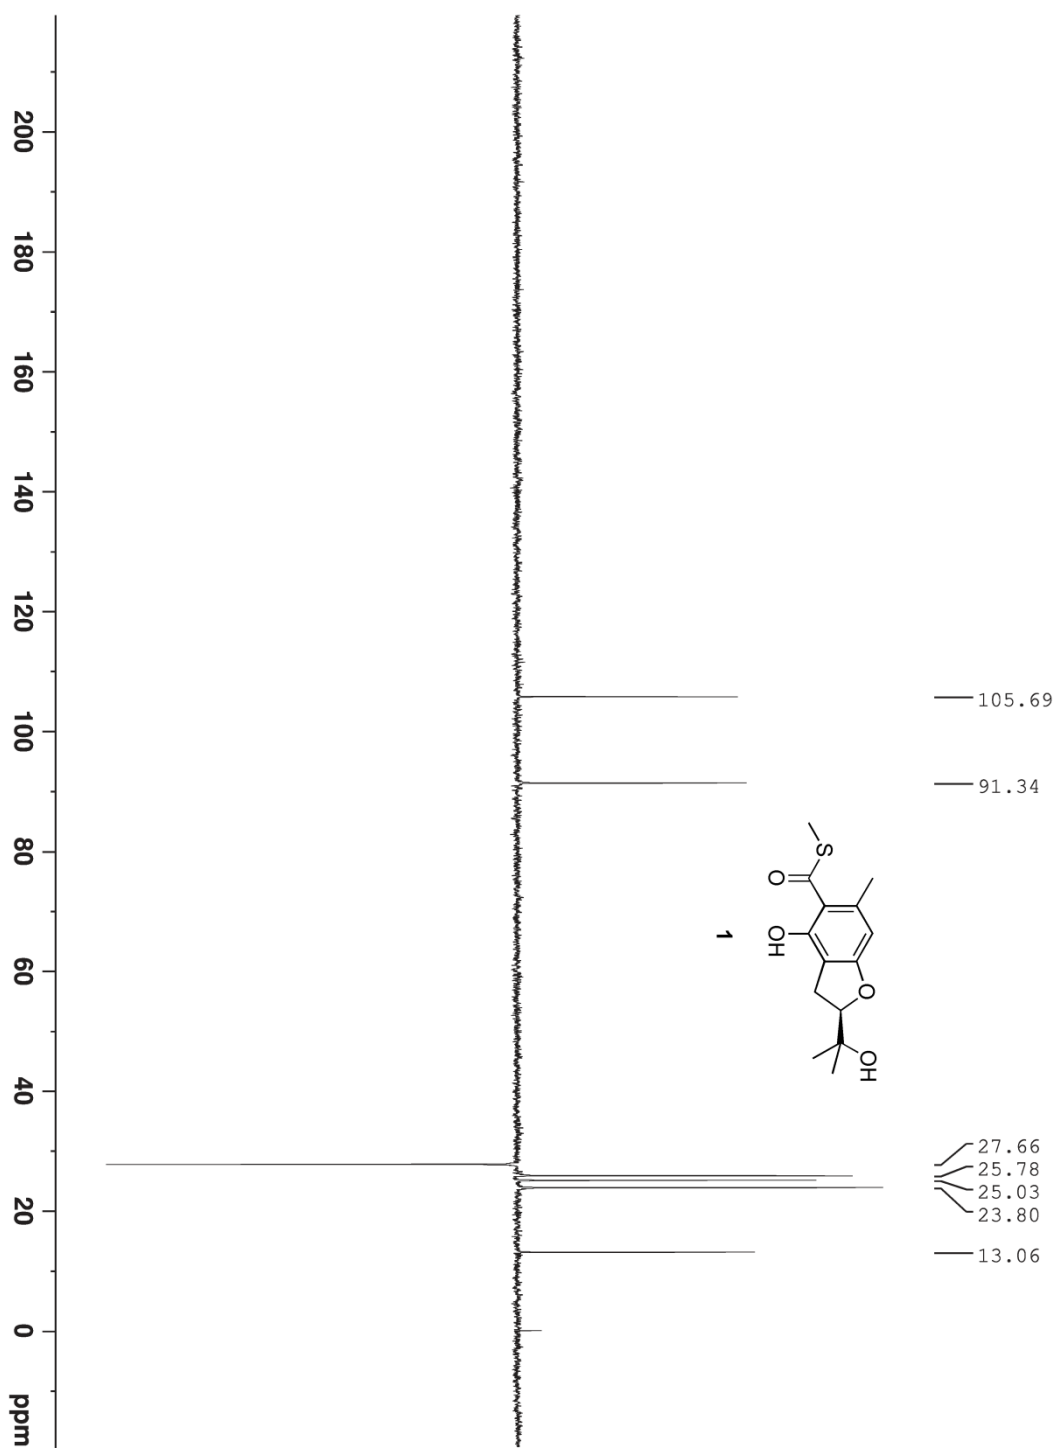

**Figure S5.** H–H COSY spectrum of eurothiocin A (**1**).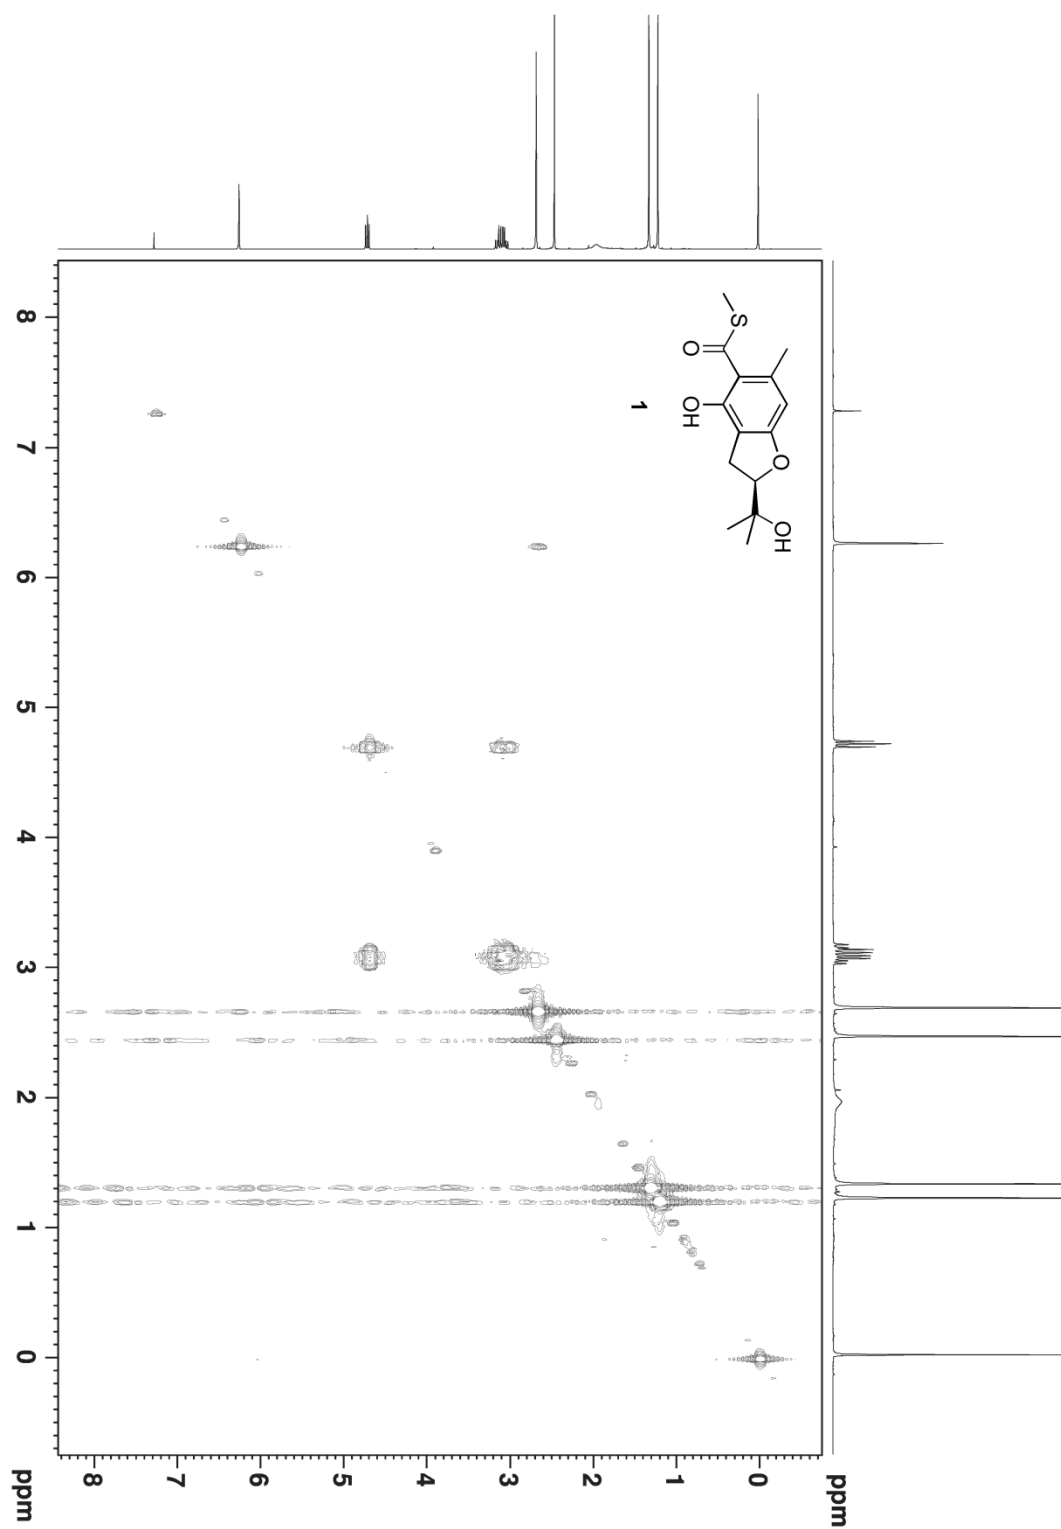

Figure S6. HSQC spectrum of eurothiocin A (1).

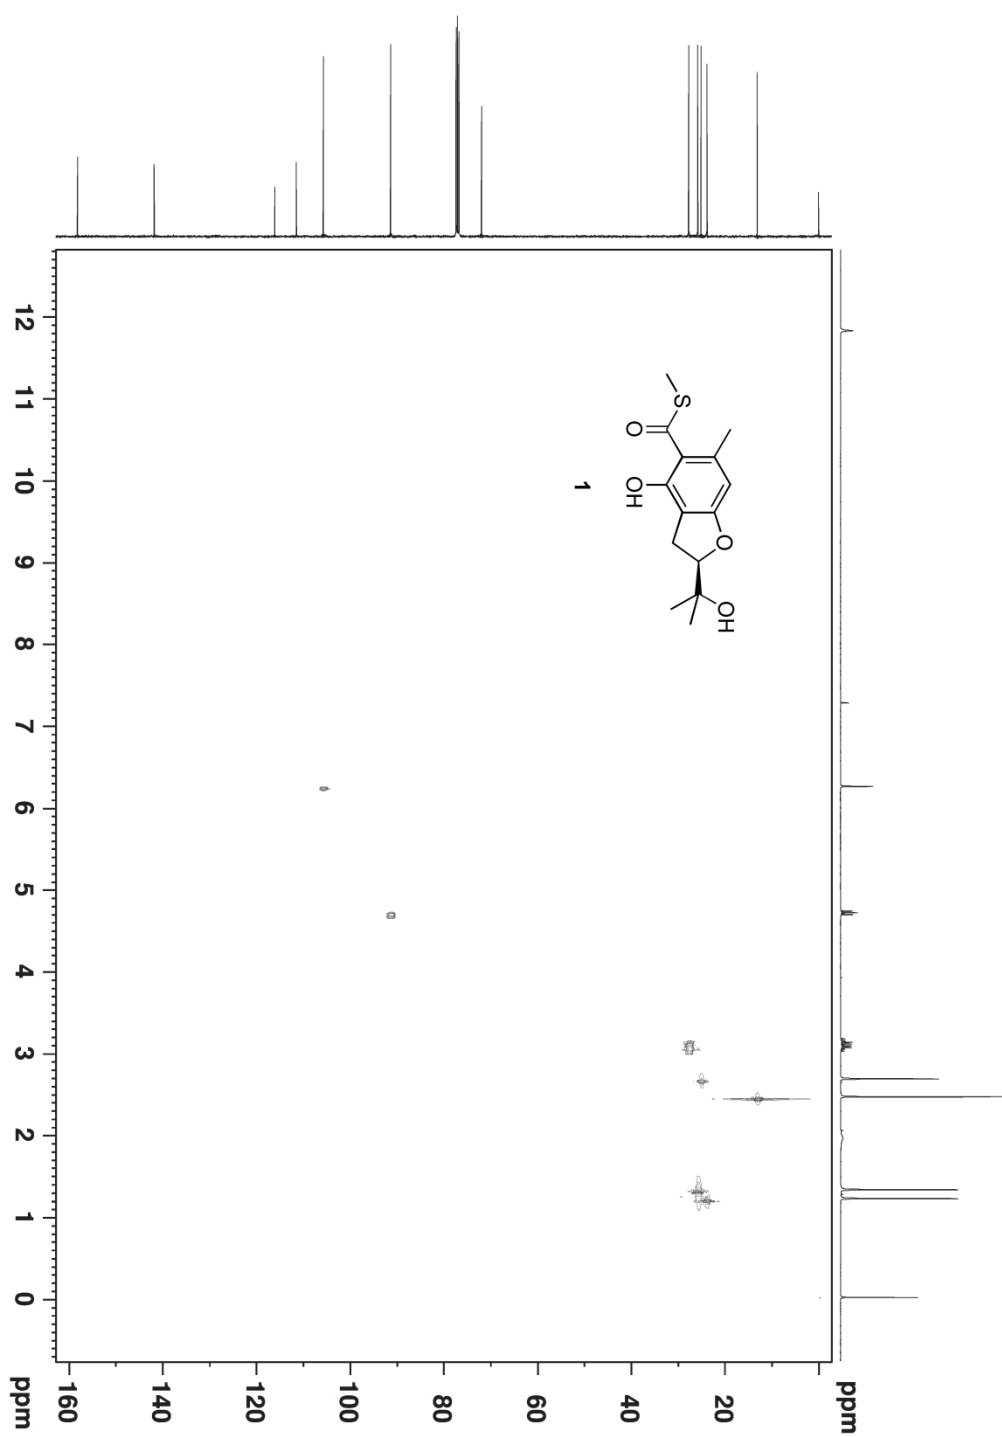

Figure S7. HMBC spectrum of eurothiocin A (1).

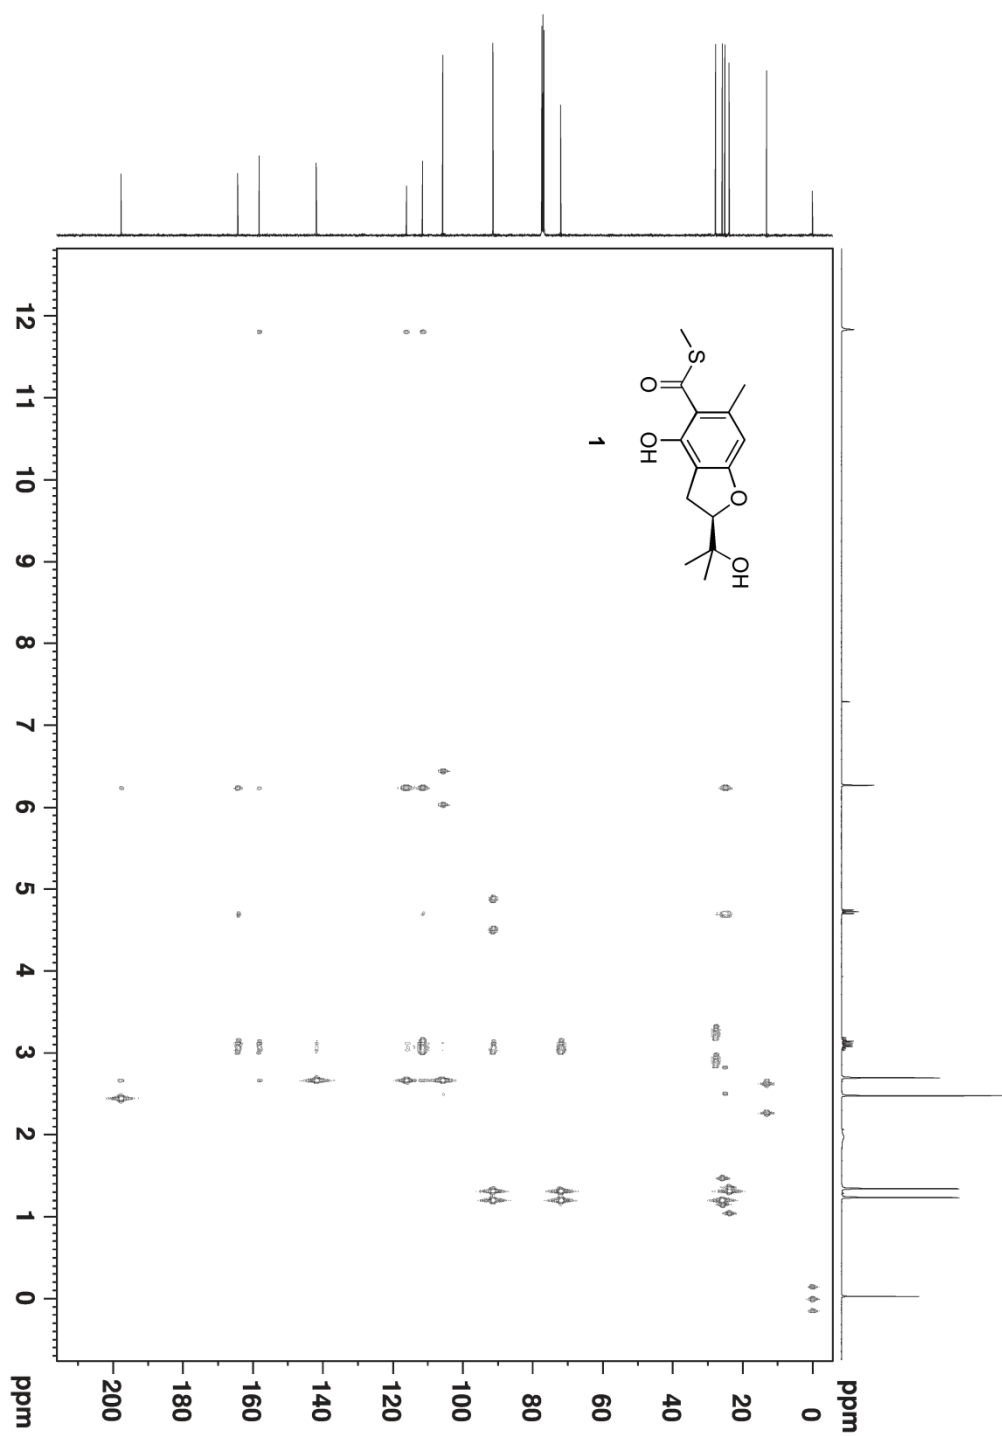

**Figure S8.**  $^1\text{H}$  NMR spectrum (400 MHz,  $\text{CDCl}_3$ ) of eurothiocin B (**2**).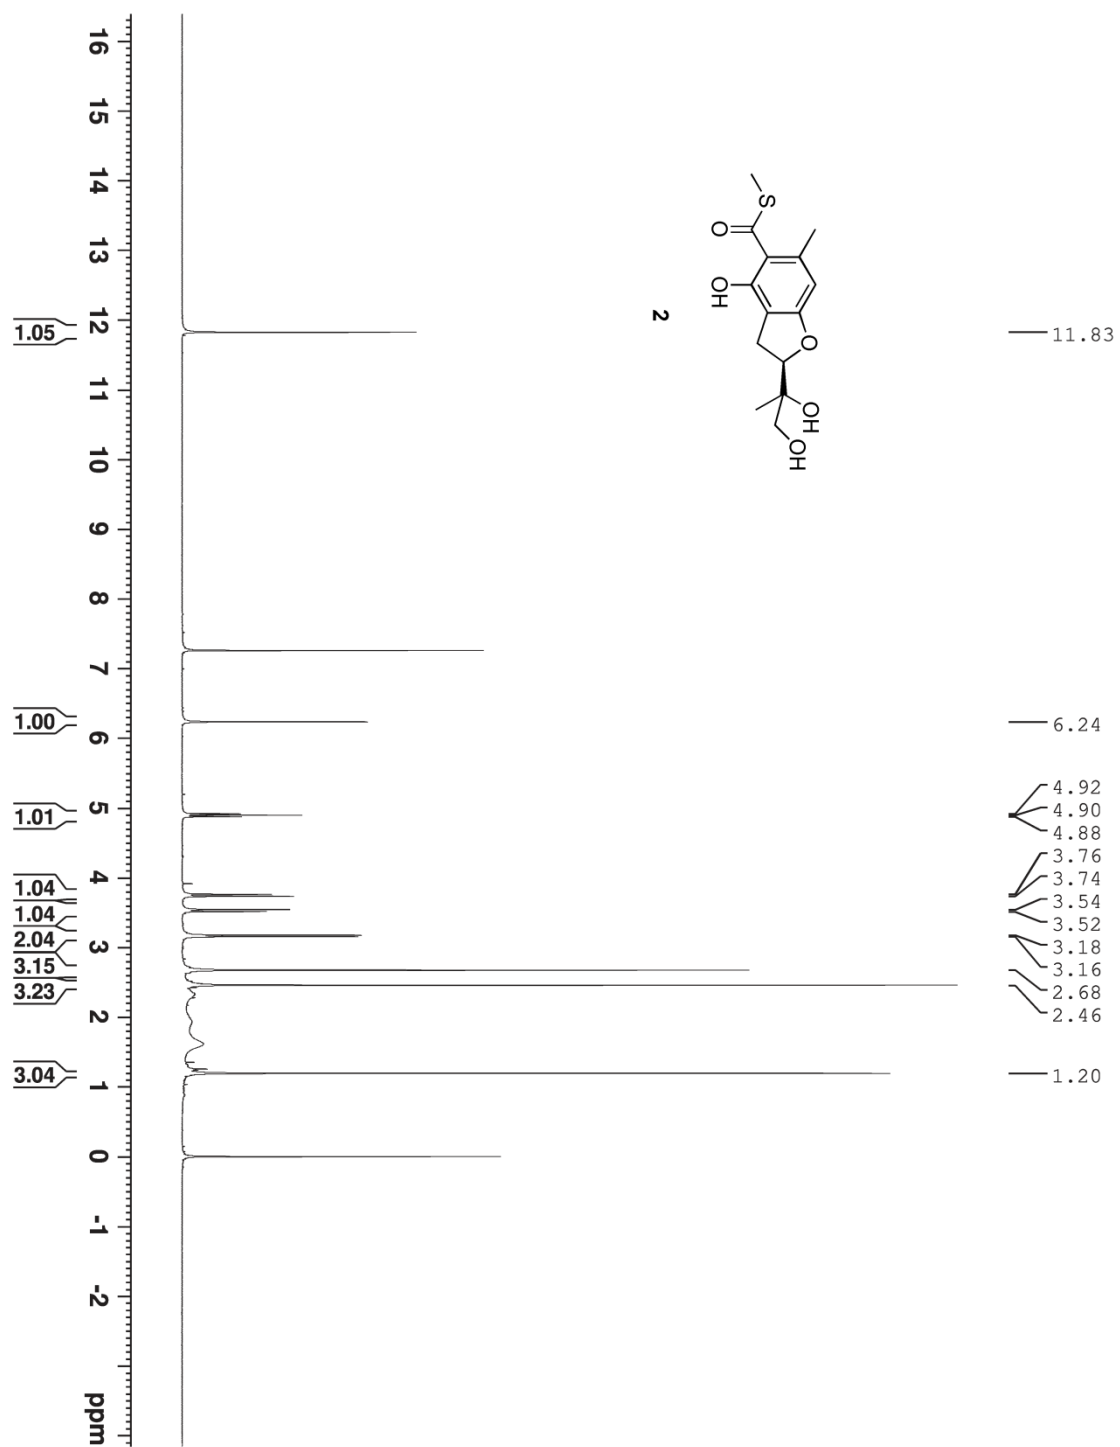



**Figure S9.**  $^{13}\text{C}$  NMR spectrum (100 MHz,  $\text{CDCl}_3$ ) of eurothiocin B (**2**).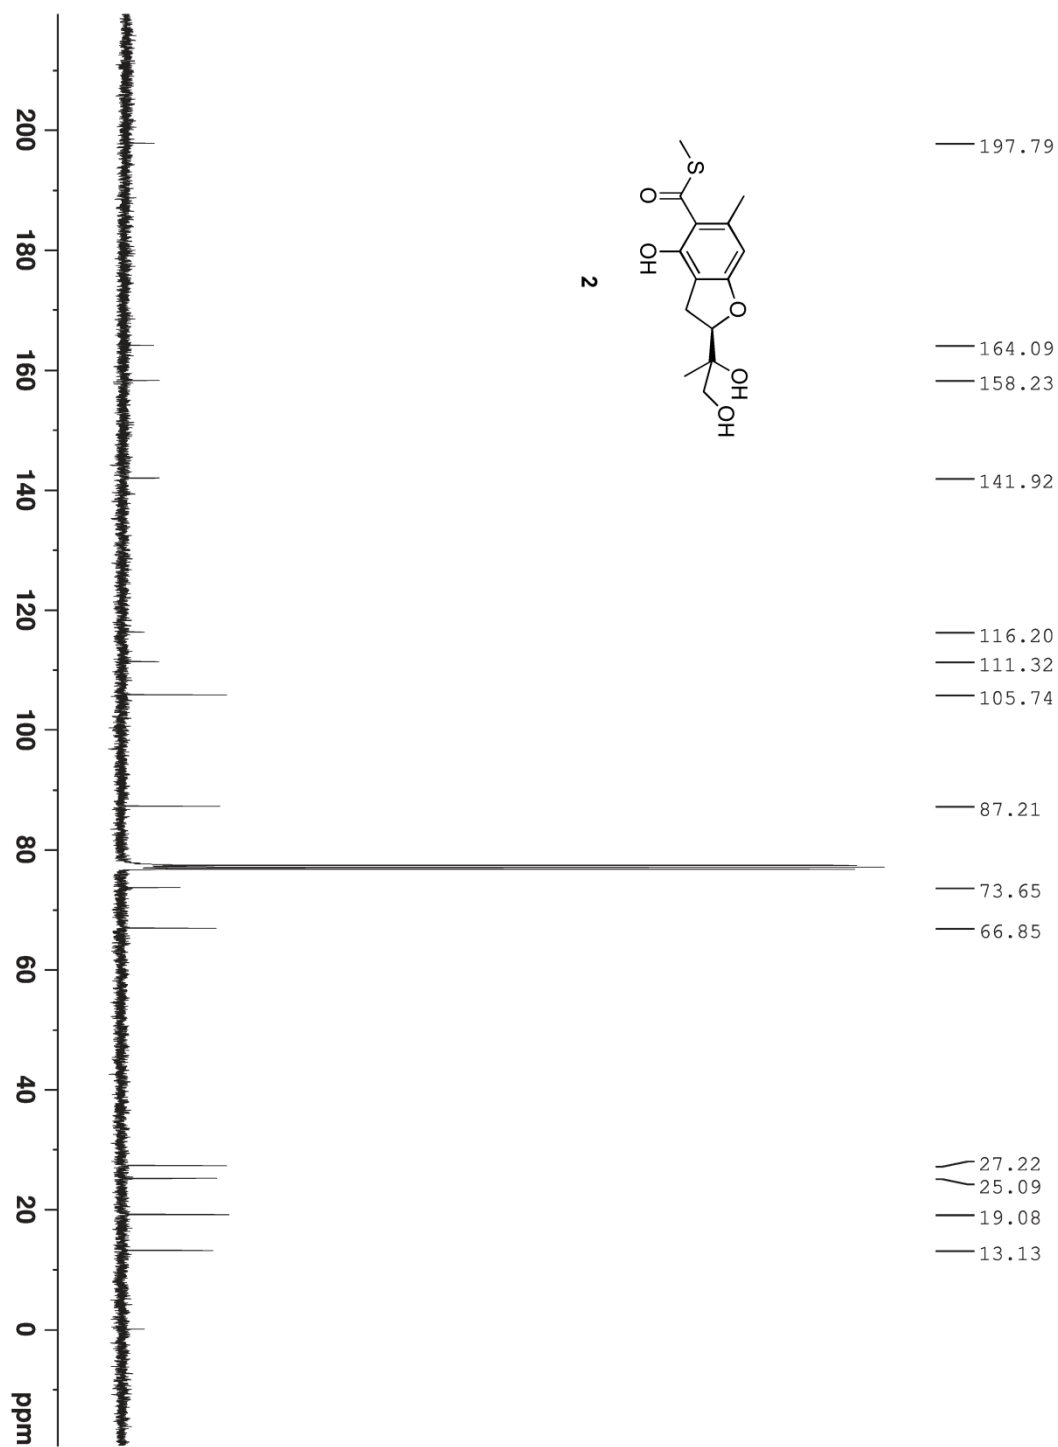

Figure S10. DEPT 90 spectrum of eurothiocin B (2).

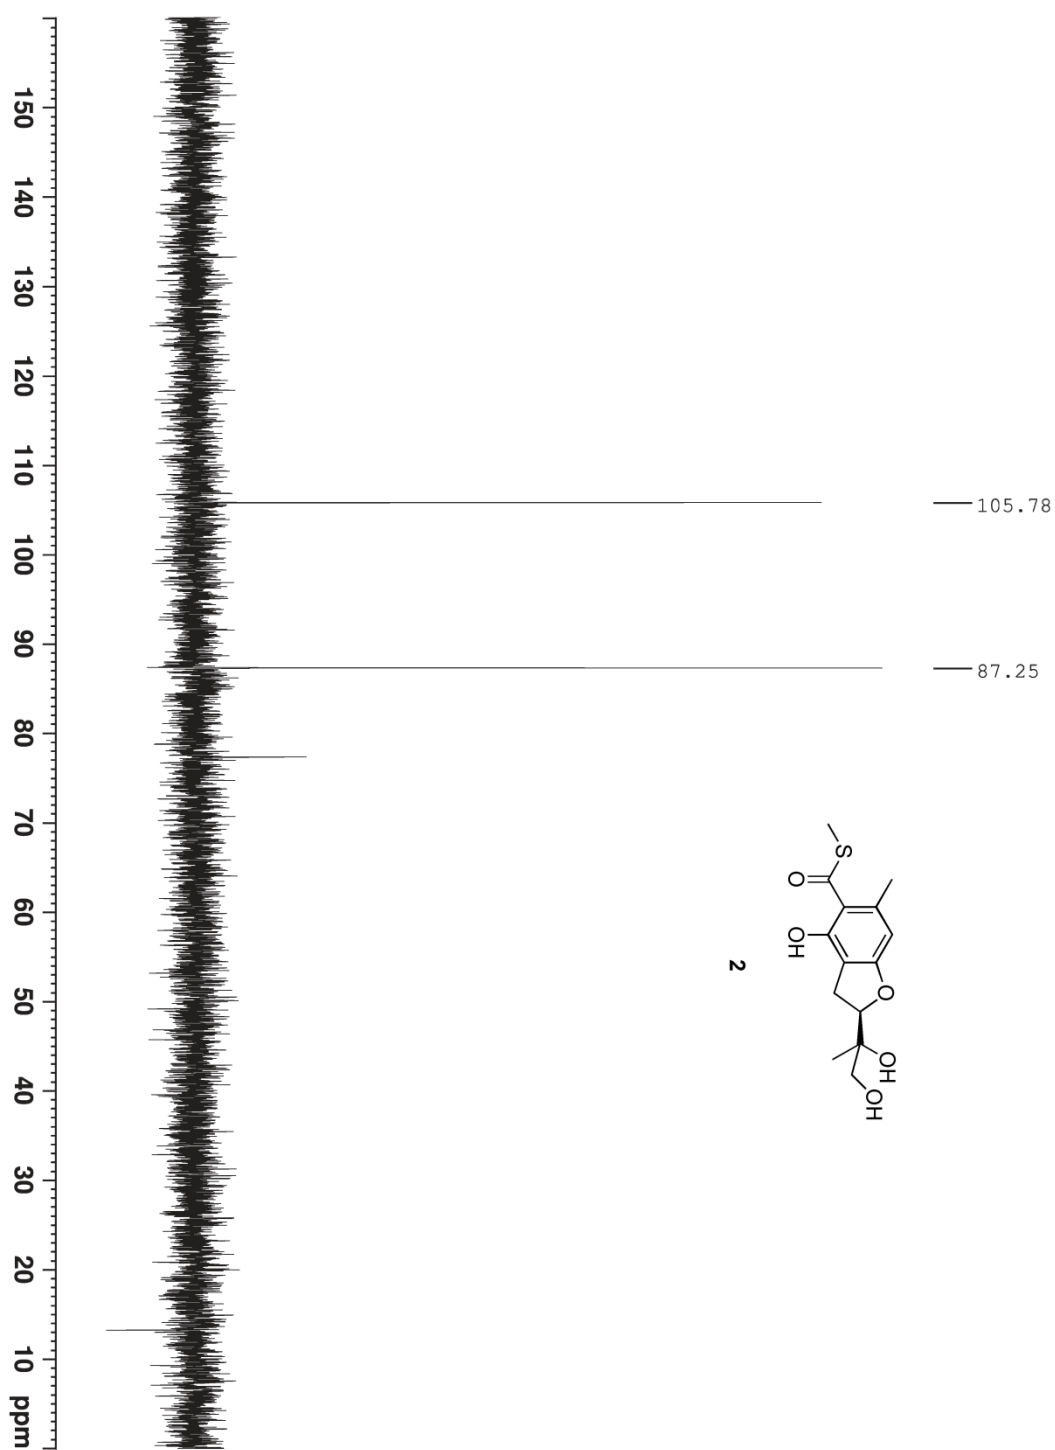

Figure S11. DEPT 135 spectrum of eurothiocin B (2).

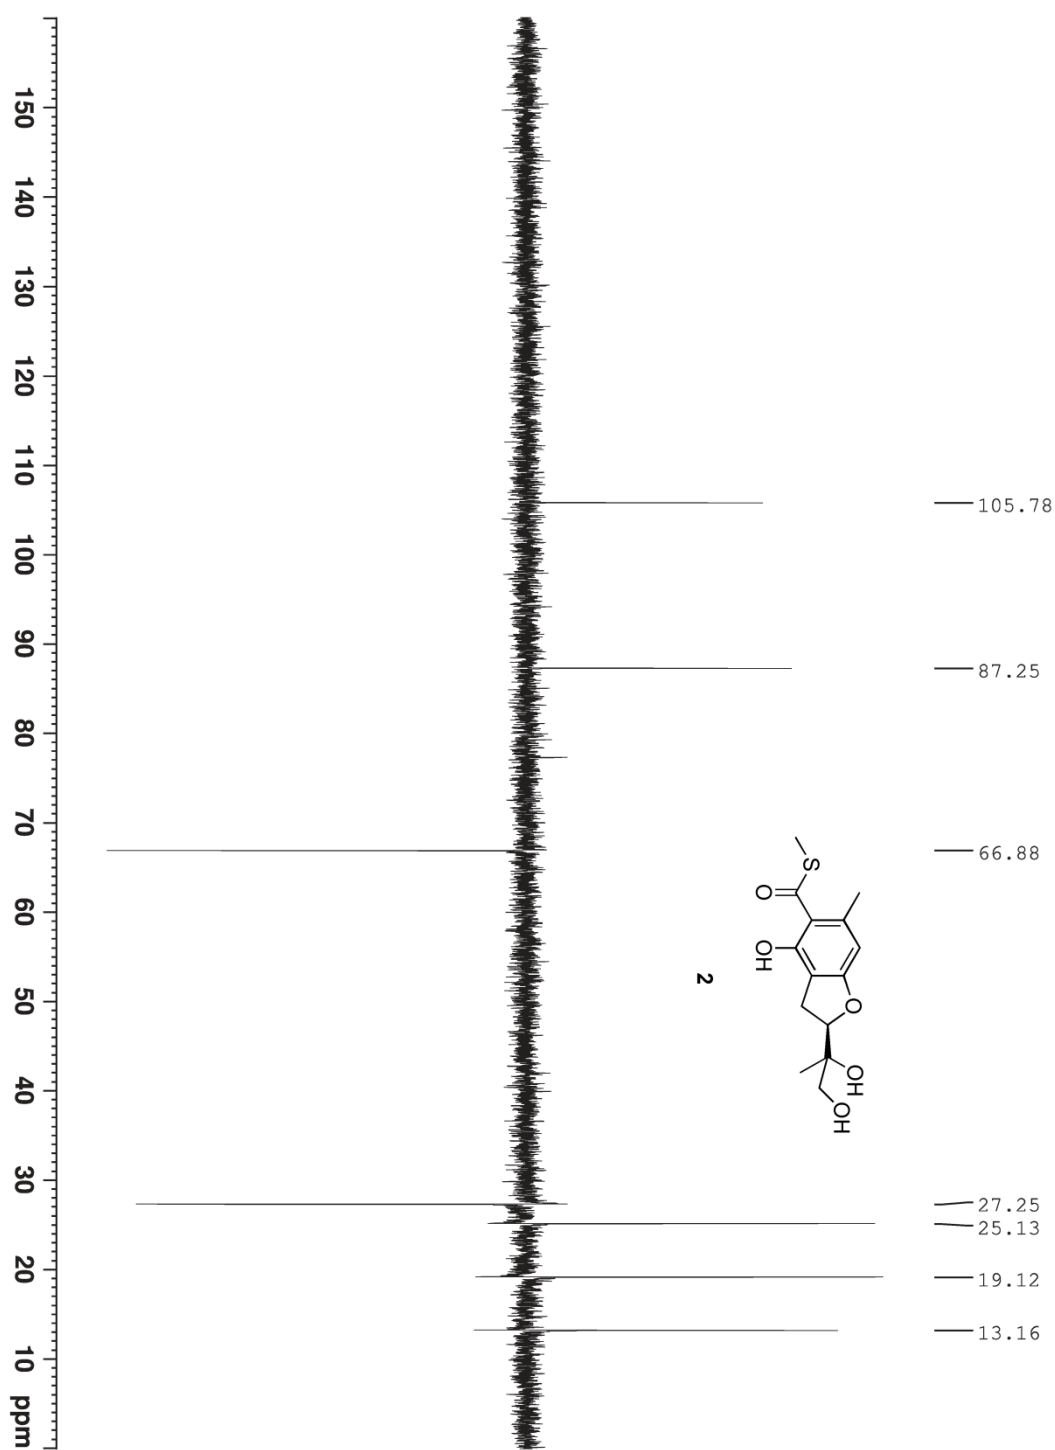

**Figure S12.**  $^1\text{H}$ - $^1\text{H}$  COSY spectrum of eurothiocin B (2).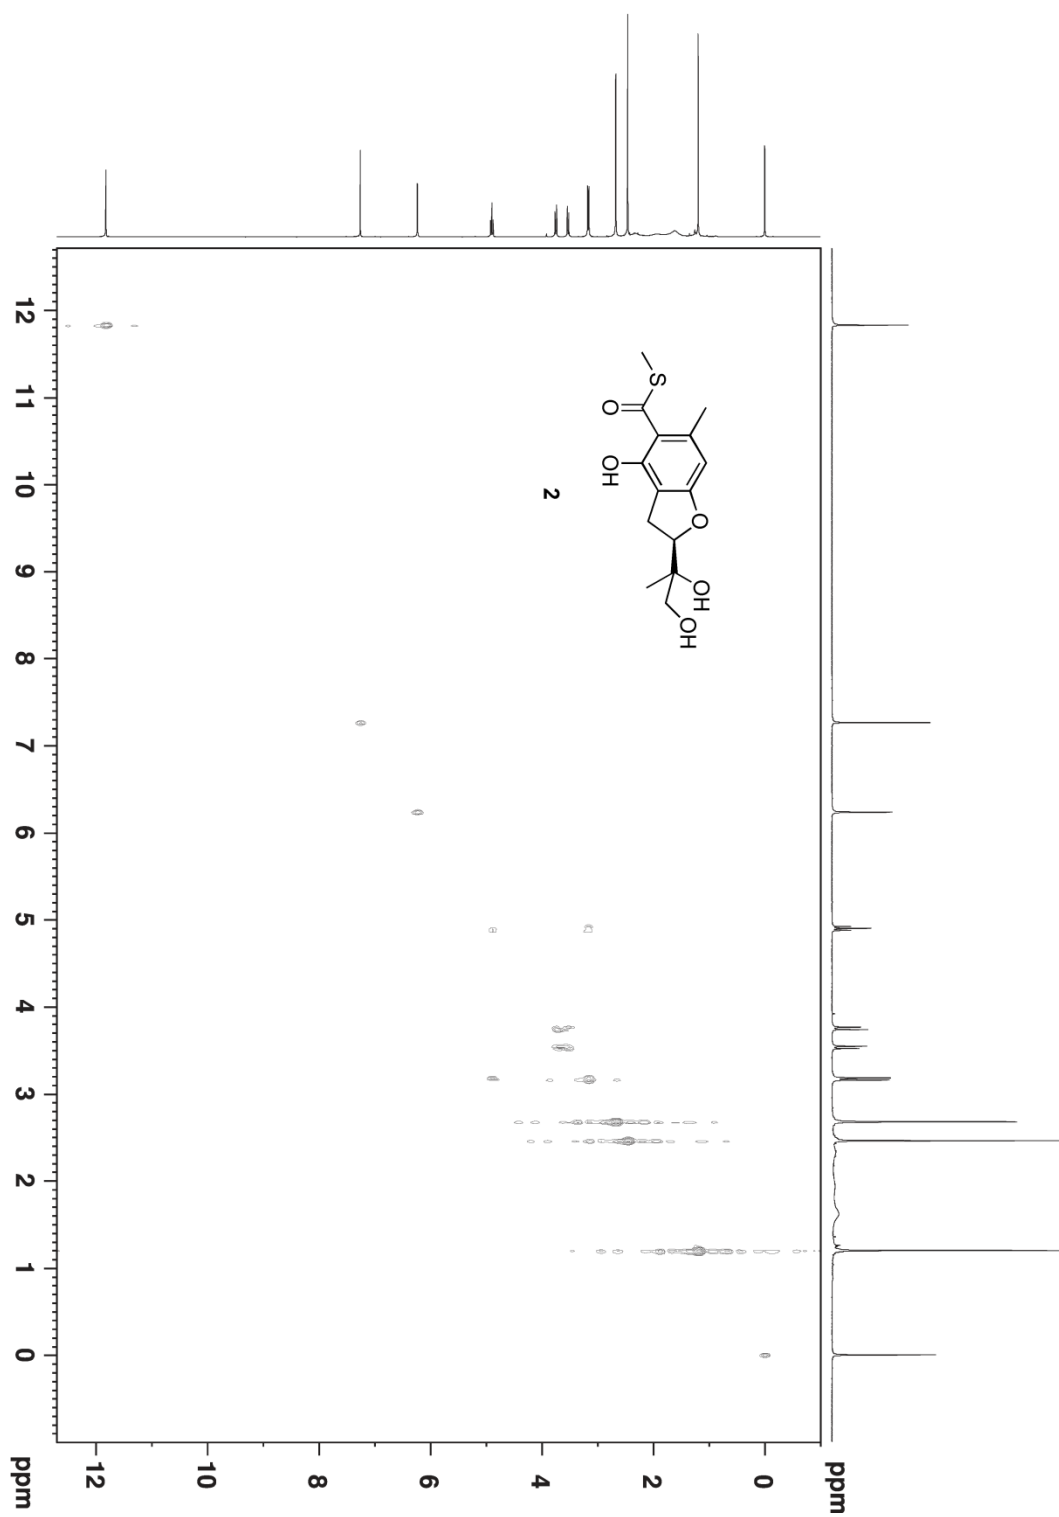

Figure S13. HSQC spectrum of eurothiocin B (2).

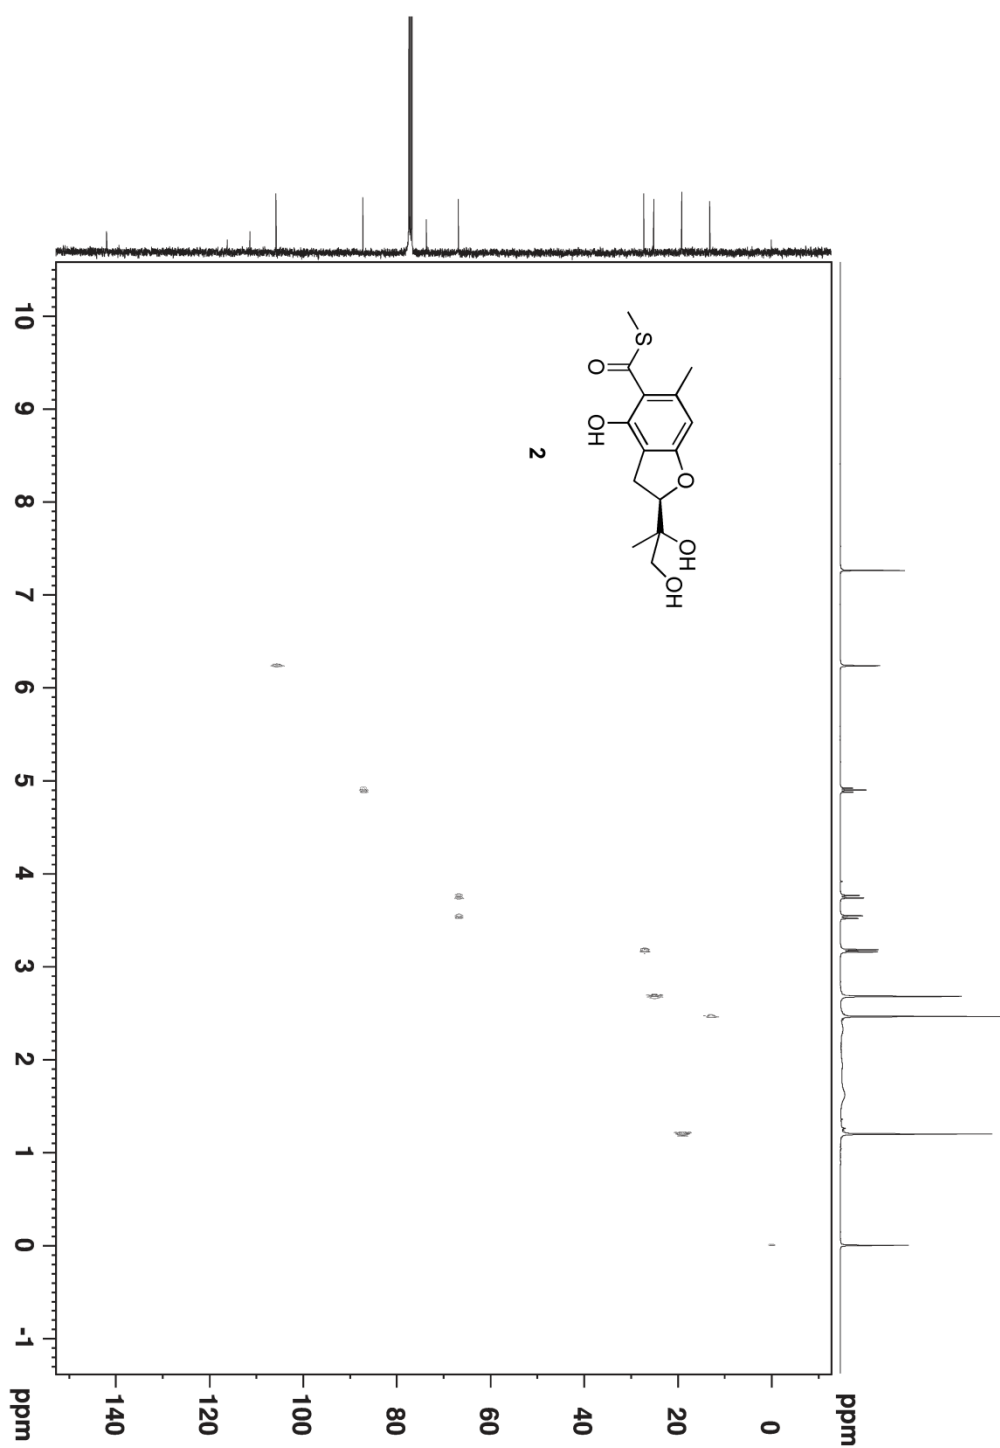

Figure S14. HMBC spectrum of eurothiocin B (2).

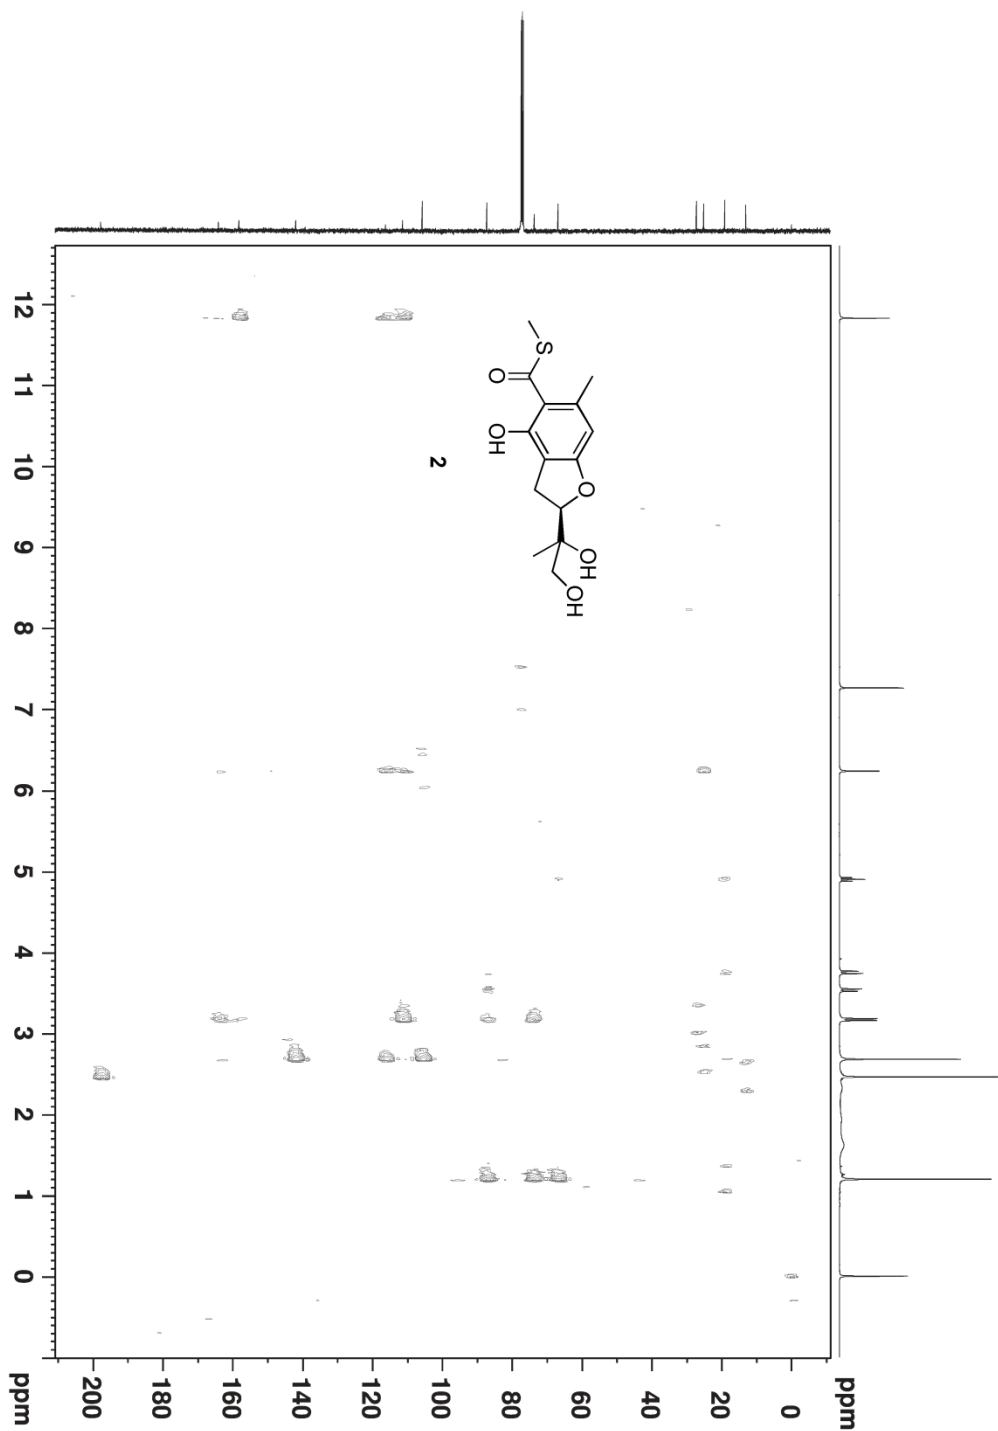

**Figure S15.** Calculated ECD spectra of the four most stable conformers of (*R*)-1.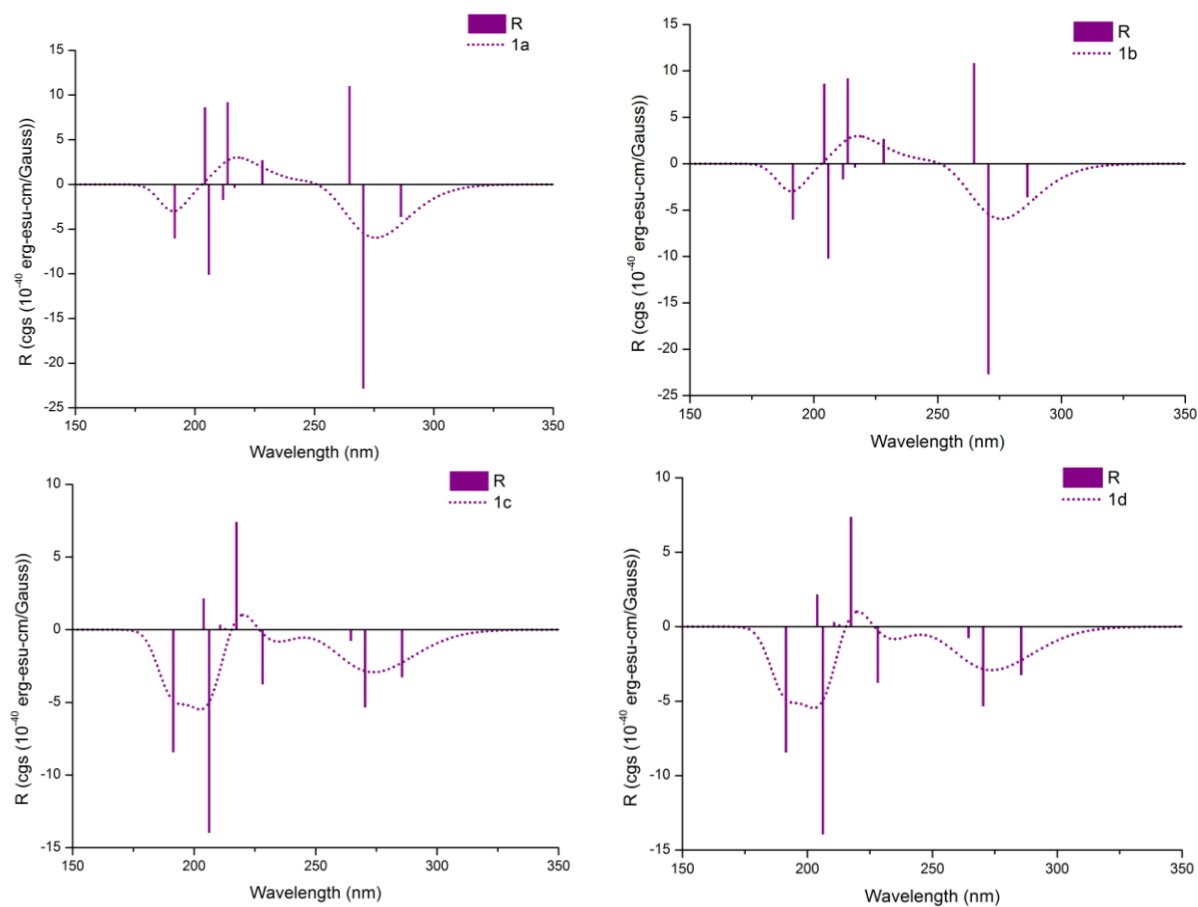

© 2014 by the authors; licensee MDPI, Basel, Switzerland. This article is an open access article distributed under the terms and conditions of the Creative Commons Attribution license (<http://creativecommons.org/licenses/by/3.0/>).
